# Supplementary material for: The Clinicopathological and Prognostic Value of PD-L1 Expression in Cholangiocarcinoma: A Meta-Analysis
Source: Front Oncol. 2019 Sep 18;9:897. doi: 10.3389/fonc.2019.00897 (PMC6759577; doi:10.3389/fonc.2019.00897)
Supplement: Supplementary file 1 [file Table_1.XLSX]

## Sheet: Sheet1
Table S1 Meta-regression analysis for overall survival
Variables	Coefficient (SE)	95% CI	P for covariates	REML estimate of between-study variance (τ2)	Proportion of between-study variance explained
Overall survival
Positive rate of PD-L1 (%)	1.53 (0.96)	0.36-6.53	0.68	0.8663	-0.19
patient’s ethnicity	2.16 (1.03)	0.72-6.46	0.144	0.7923	-0.0883
Proportion of male (%)	1.29(1.99)	0.04-45.29	0.874	0.8574	-0.1777
Proportion of poor differentiaton (%)	2.74 (2.65)	0.29-25.48	0.327	0.829	-0.1391
Abbreviations: SE: standard error; CI: confidence interval; PD-L1: programmed death ligand 1.
